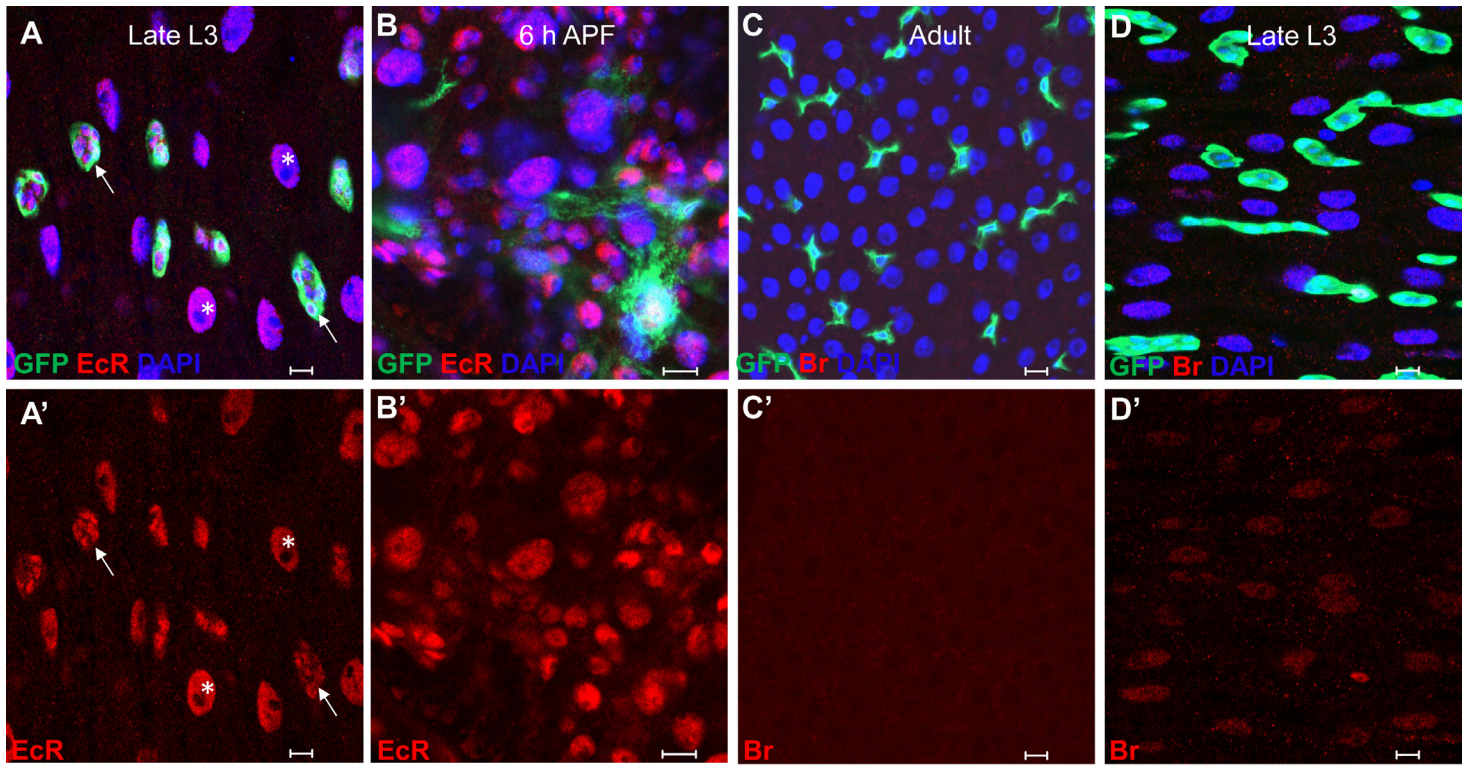

**Fig. S1. EcR is expressed in all cell types in the midgut.** (A-B') *Su(H)GBE-Gal4, UAS-mCD8-GFP* flies were stained at late L3 and 6 hours APF using the EcR (common) antibody. EcR was expressed evenly in all cell types, including AMPs (arrow) and ECs (star). GFP, green; EcR (common), nuclear red; DAPI, nuclear blue. (C,C') Adult *Su(H)GBE-Gal4, UAS-mCD8-GFP* flies were stained at 7 days after eclosion using the Br core antibody. The expression of Br was undetectable in the adult midgut. (D,D') Br was efficiently depleted in GFP-labeled cells, in which *UAS-br<sup>dr</sup>* was driven by *esg<sup>ts</sup>*. GFP, green; Br core, nuclear red; DAPI, nuclear blue. Scale bars: 10 μm.

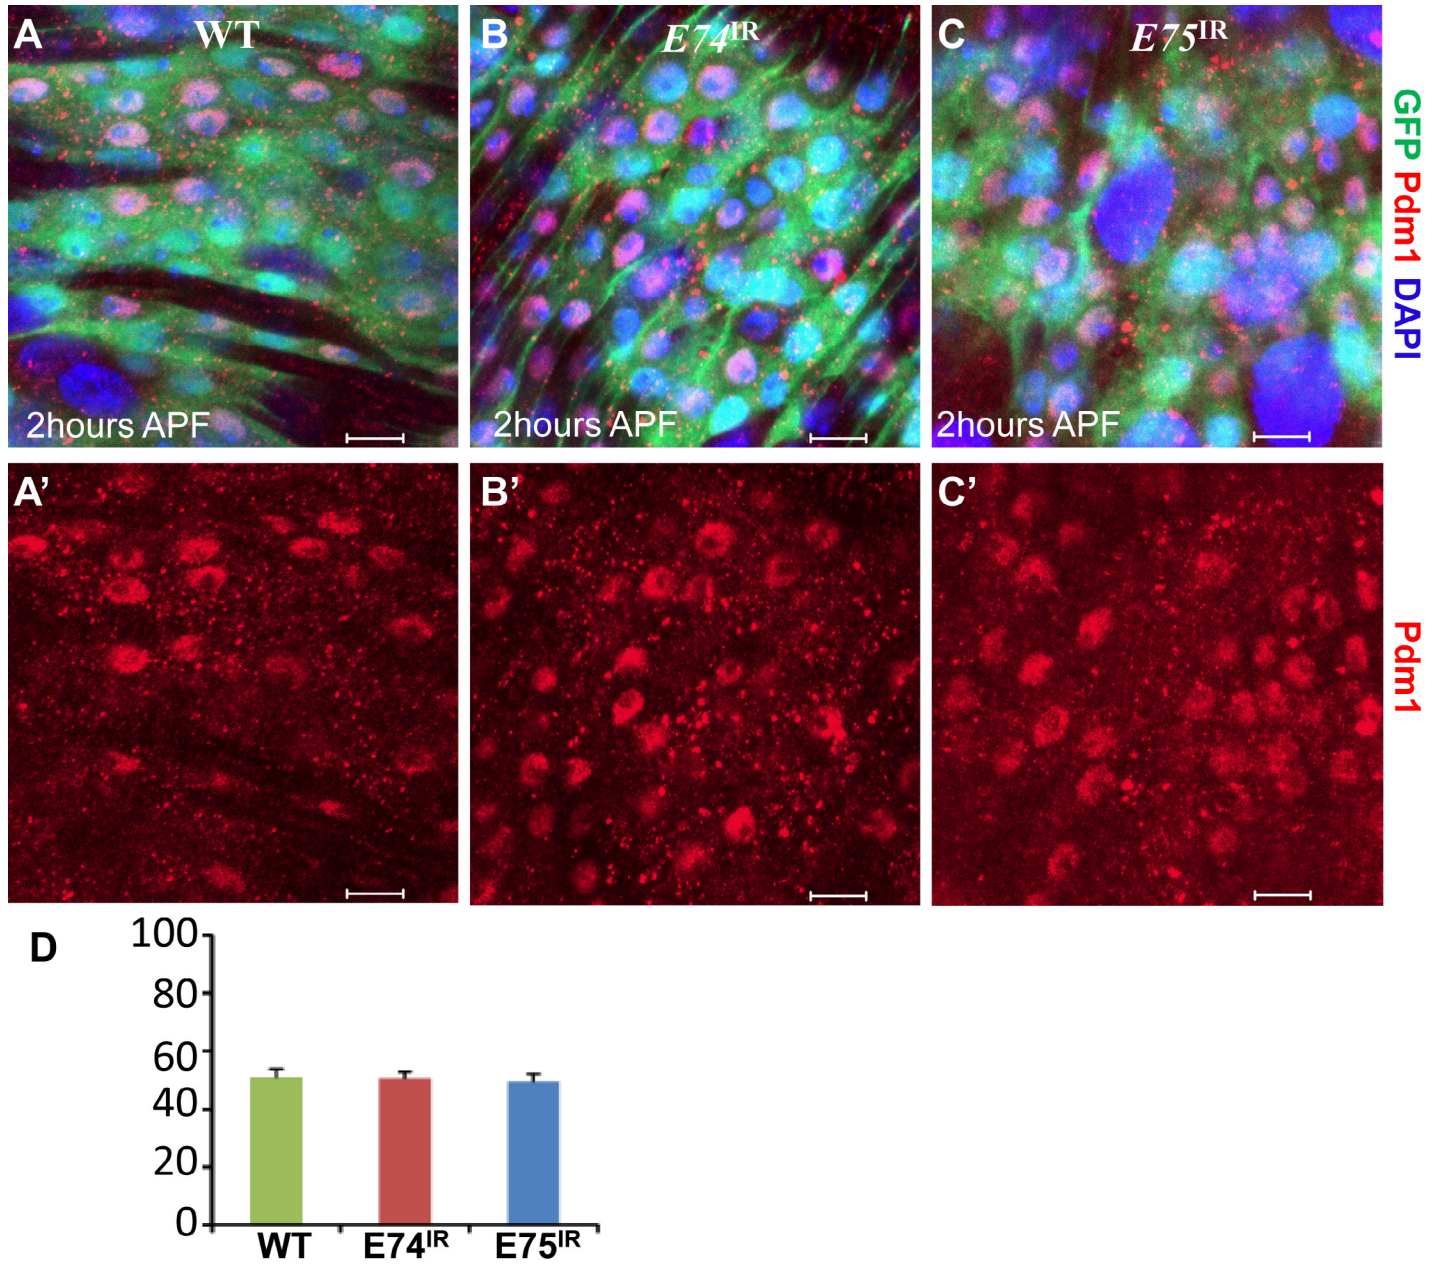

**Fig. S2. Depletion of *E74* or *E75* does not block AMP differentiation.** (A-C') Wild-type (A,A'), *UAS-E74<sup>IR</sup>*, (B,B') or *UAS-E75<sup>IR</sup>* (C,C') was driven by *esg<sup>ts</sup>* at 29°C and stained with indicated antibodies at 2 hours APF. *E74* or *E75* depletion did not block AMP release from islands and differentiation into Pdm1-positive ECs. (D,D') The percentage of Pdm1-positive ECs in GFP-labeled cells in wild-type control and *E74* and *E75*-RNAi flies at 2 hours APF. Data are represented as mean±s.e.m., no significant difference was found between the wild-type control and *E74*- and *E75*-RNAi flies. GFP, green; Pdm1, nuclear red; DAPI, nuclear blue. Scale bars: 10 µm.



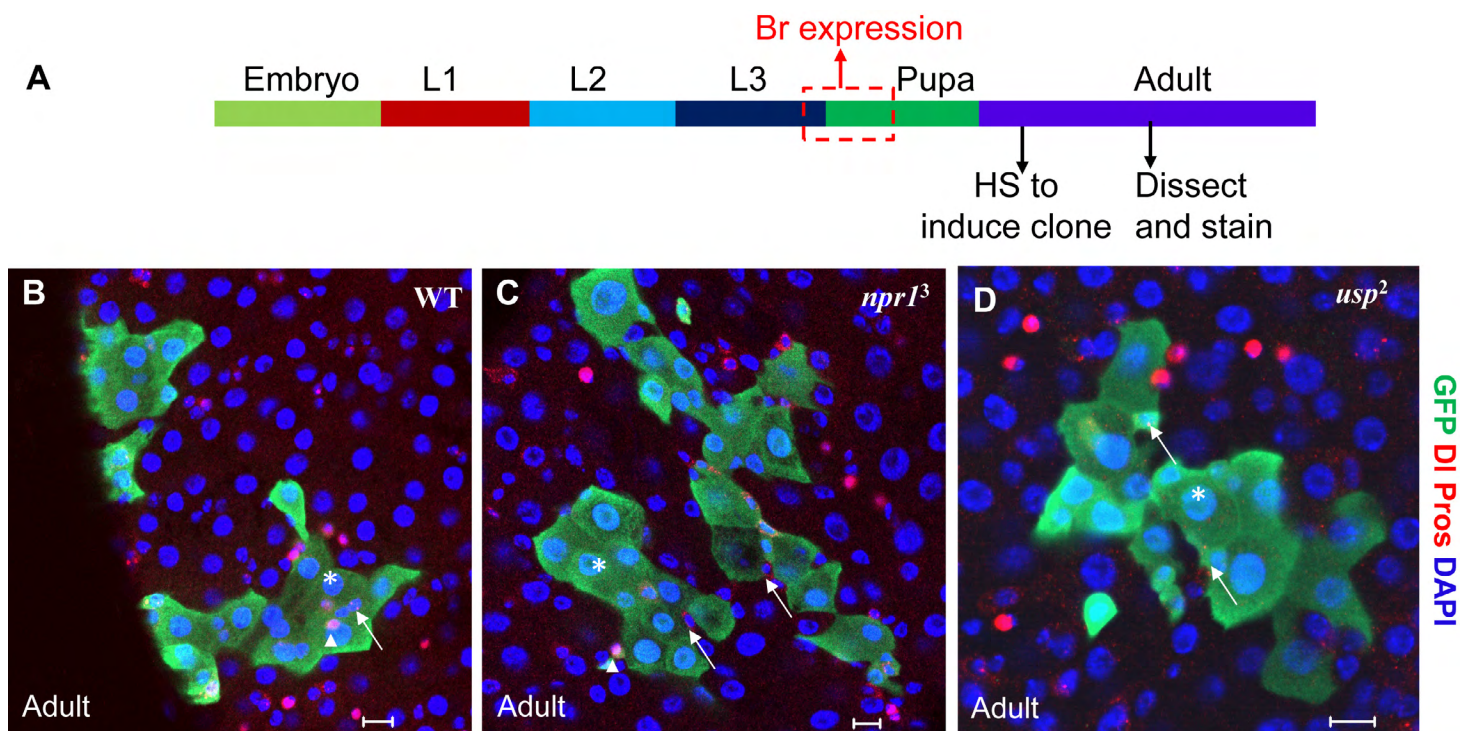

**Fig. S3. Broad and EcR signals are not required for adult ISC differentiation.** (A) The experimental design for generating ISC MARCM clones by heat shock (HS) in the adult midgut. One-week-old flies were heat shocked twice for 45 minutes and were dissected for staining in 5 days. (B-D) *br* (C) and *usp* (D) are not required for adult ISC differentiation and their mutant ISC MARCM clones were similar to wild-type MARCM clones (B). Arrow, ISC; arrowhead, EE; Star, EC. GFP, green; DI, cytoplasmic red, Pros, nuclear red; DAPI, nuclear blue. Scale bars: 10  $\mu$ m.

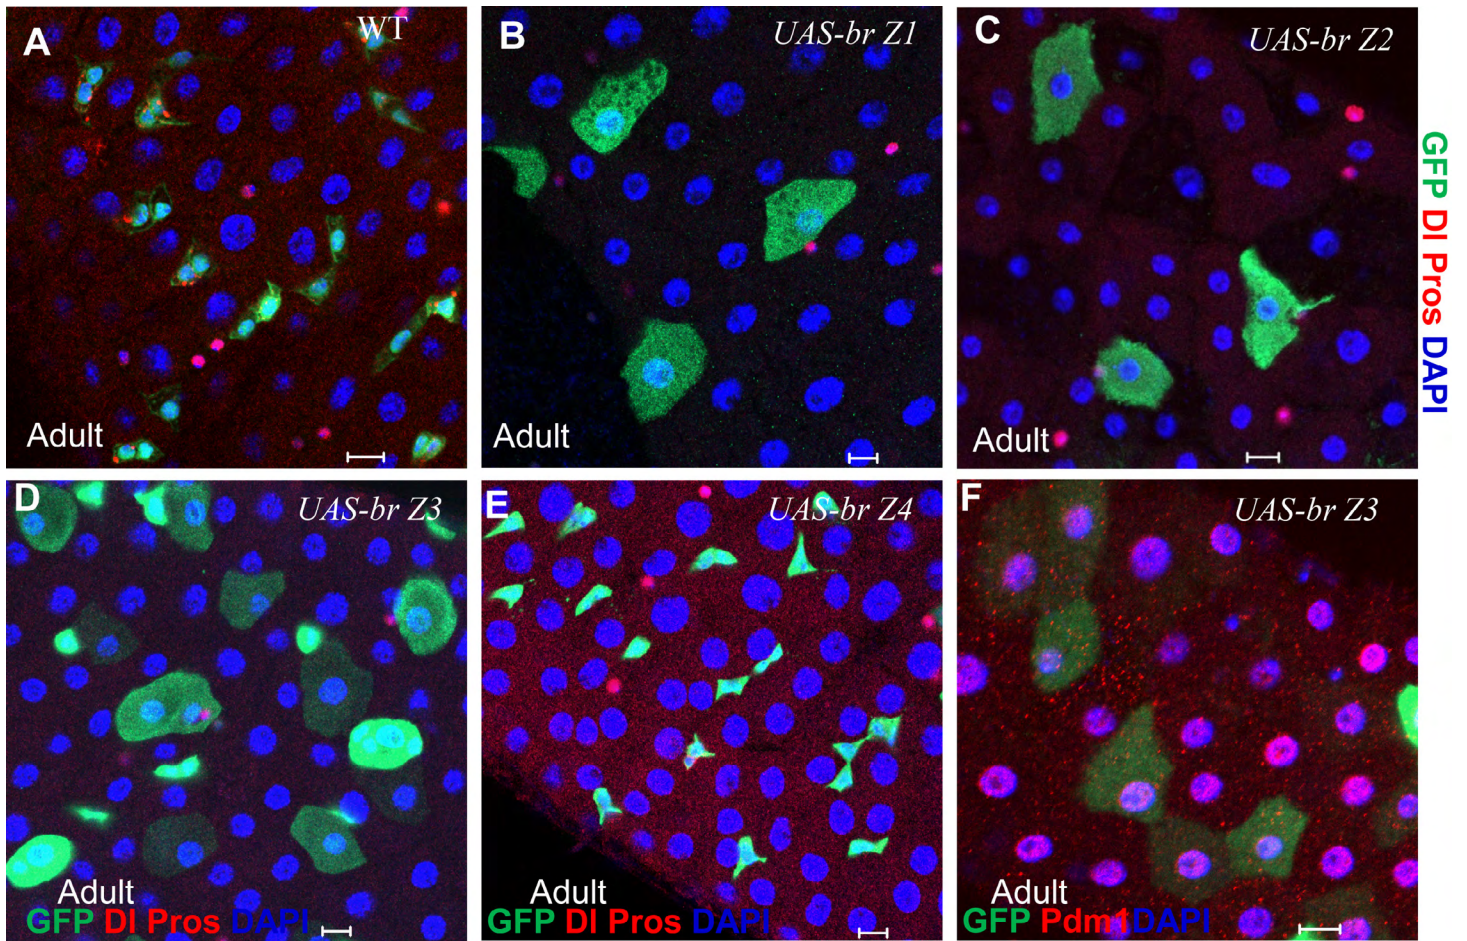

**Fig. S4. Ectopic expression of Br drives ISC differentiation into EC-like cells in the adult midgut.** (A-F) A wild-type control (A), *UAS-br Z1* (B), *UAS-br Z2* (C), *UAS-br Z3* (D,F) or *UAS-br Z4* (E) was driven by *esg<sup>ts</sup>* in adult ISC at 29°C for 7 days. Ectopic overexpression of *br* in adult ISCs drove ISCs to differentiate into EC-like cells, which can be labeled by EC-specific marker Pdm1 (F). GFP, green; DL, cytoplasmic red; Pros, nuclear red (in F: Pdm1, nuclear red); DAPI, nuclear blue. Scale bars: 10 μm.



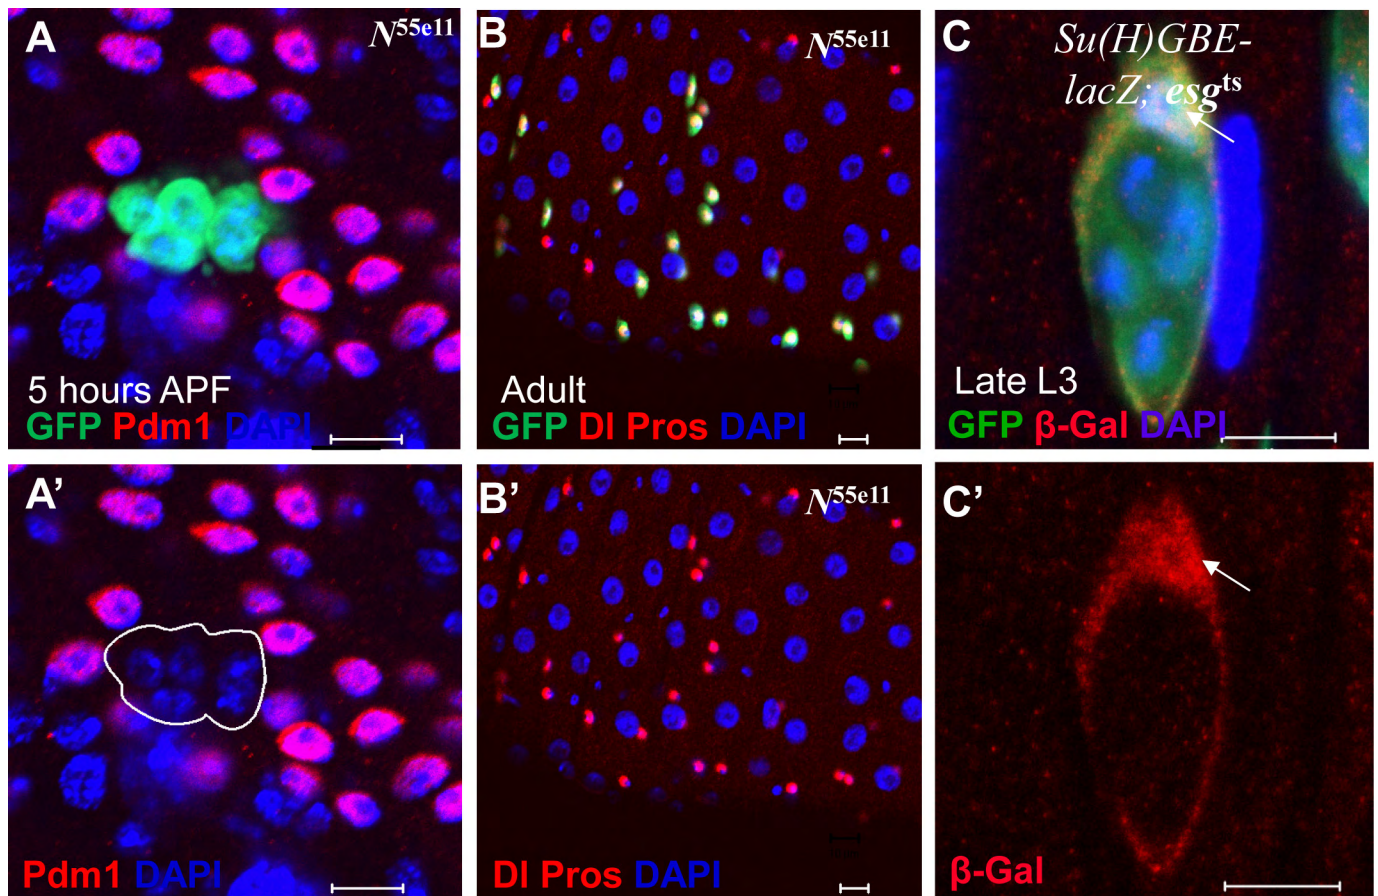

**Fig. S5. Notch signaling is required for AMPs to develop into ECs.** (A,A') *N*-mutant MARCM is generated using the method shown in Fig. 3A. Compared with the wild-type control in Fig. 3B,B', GFP-labeled *N*-mutant AMPs were still Pdm1-negative at 5 hours APF. GFP, green; Pdm1, nuclear red; DAPI, nuclear blue. (B,B') GFP-labeled *N* mutant AMPs generated using the methods shown in Fig. 4A were traced to the adult stage. All GFP-labeled *N* mutant AMPs developed into EEs labeled with nuclear staining of Pros in the adult midgut. GFP, green; DI cytoplasmic red; Pros, nuclear red; DAPI, nuclear blue. (C,C') A wild-type control was driven by *Su(H)GBE-lacZ; esg<sup>ts</sup>*. The expression of *Su(H)GBE-lacZ*, an *N* activity reporter, was detected in PC (arrow). GFP, green;  $\beta$ -galactosidase, red; DAPI, nuclear blue. Scale bars: 10  $\mu$ m.



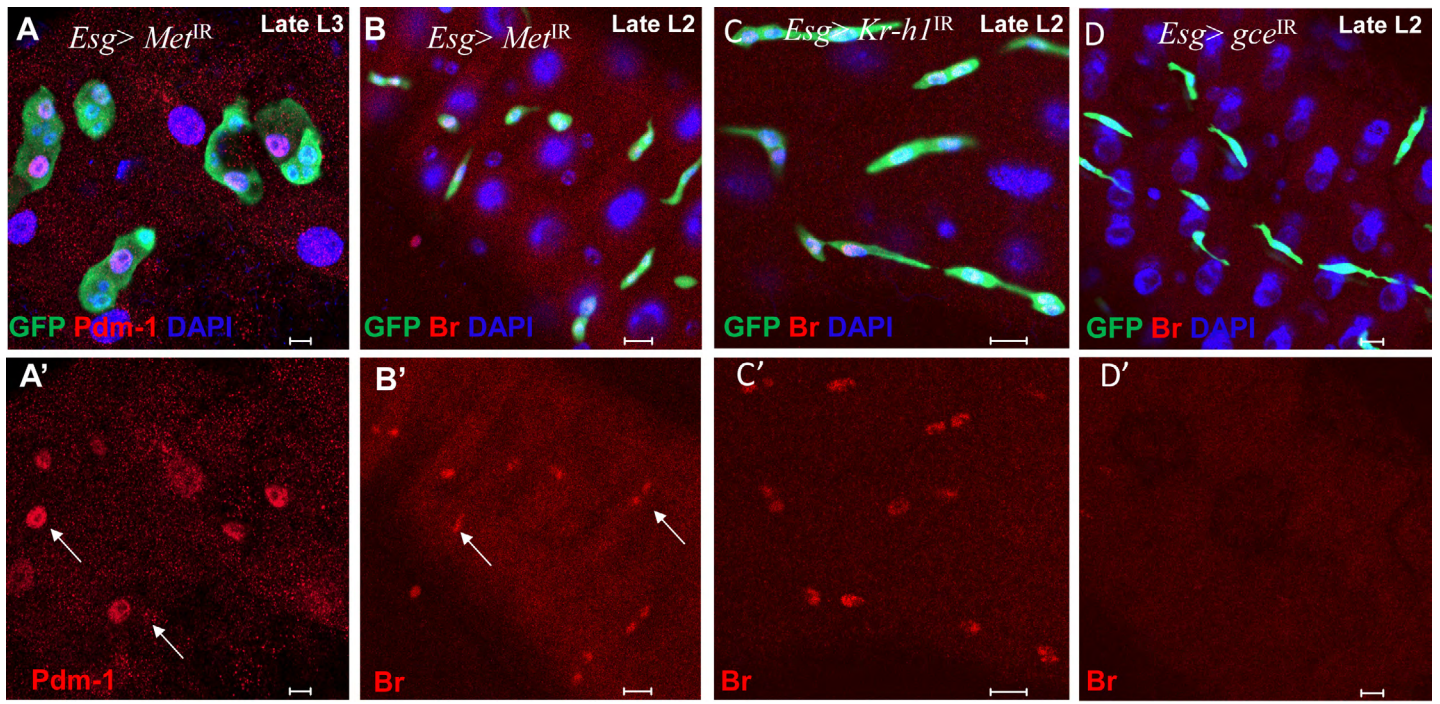

**Fig. S6. *Met* knockdown induced AMP premature differentiation.** (A-D') *UAS-Met<sup>IR</sup>* (A,A',B,B'), *UAS-Kr-hl<sup>IR</sup>* (C,C') or *UAS-gce<sup>IR</sup>* (D,D') was driven by *esg<sup>ts</sup>*. *Met* knockdown resulted in AMP premature differentiation and precocious Br expression. *Kr-hl* knockdown induced precocious Br expression too, whereas *gce* knockdown did not. GFP, green; Pdm1 or Br, nuclear red; DAPI, nuclear blue. Scale bars: 10  $\mu$ m.

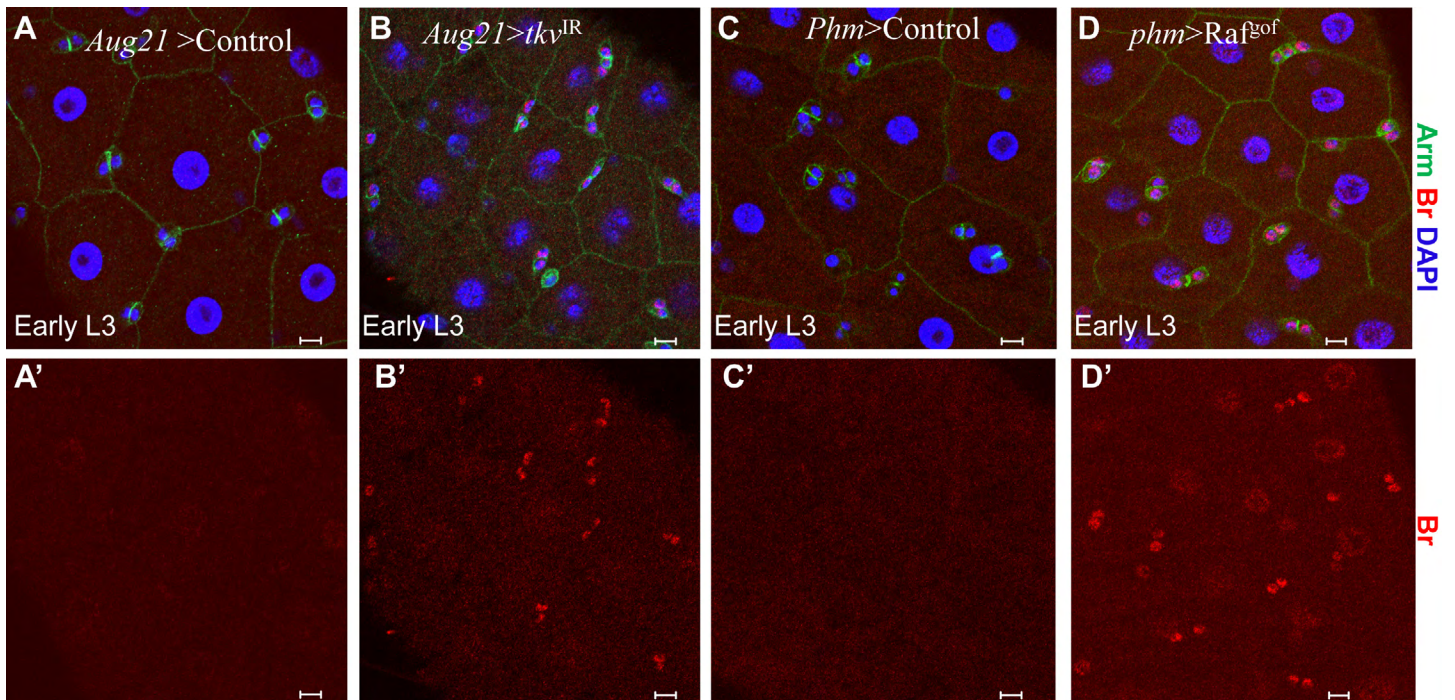

**Fig. S7. The Dpp signal transduction pathway in CA and the Ras-Raf signal transduction pathway in PG regulate Br expression in AMPs.** (A-D') When compared with wild-type controls driven by CA-specific *Aug21-Gal4* (A,A') or PG-specific *phm-Gal4* (C,C'), CA-specific knockdown of *tkv* (*Aug21>tkv<sup>IR</sup>*; B,B') or PG-specific expression of a constitutively activated form of Raf (*phm>Raf<sup>gof</sup>*; D,D') induced precocious Br expression. All flies were fixed and stained at early L3 with indicated antibodies. Arm, green; Br, nuclear red; DAPI, nuclear blue. Scale bars: 10  $\mu$ m.
